# Supplementary material for: Electrochemical sensing of pioglitazone hydrochloride on N-doped r-GO modified commercial electrodes
Source: Royal Society of Chemistry journal article supplement (doi:10.1039/d1an00224d), 2021-01-01
Supplement: d1an00224d1.pdf [file d1an00224d1.pdf]

## Supporting Information (SI)

### Electrochemical Sensing of Pioglitazone Hydrochloride on N-doped r-GO Modified Commercial Electrodes

Ashish Kumar<sup>1</sup>, S. K. Srivastava<sup>2</sup>, Monika Srivastava<sup>1\*</sup> and Rajiv Prakash<sup>1\*</sup>

<sup>1</sup>*School of Materials Science and Technology, Indian Institute of Technology (Banaras Hindu University), Varanasi-221005, UP, India*

<sup>2</sup>*Department of Physics, Institute of Science, Banaras Hindu University, Varanasi - 221005, UP, India*

\*Corresponding Authors Email: [rajivprakash12@yahoo.com](mailto:rajivprakash12@yahoo.com) and [monikabhuvastava@gmail.com](mailto:monikabhuvastava@gmail.com)

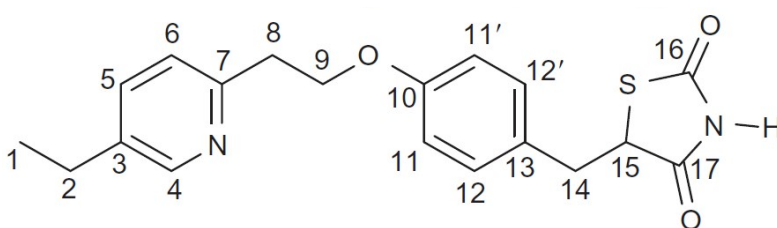

Pioglitazone

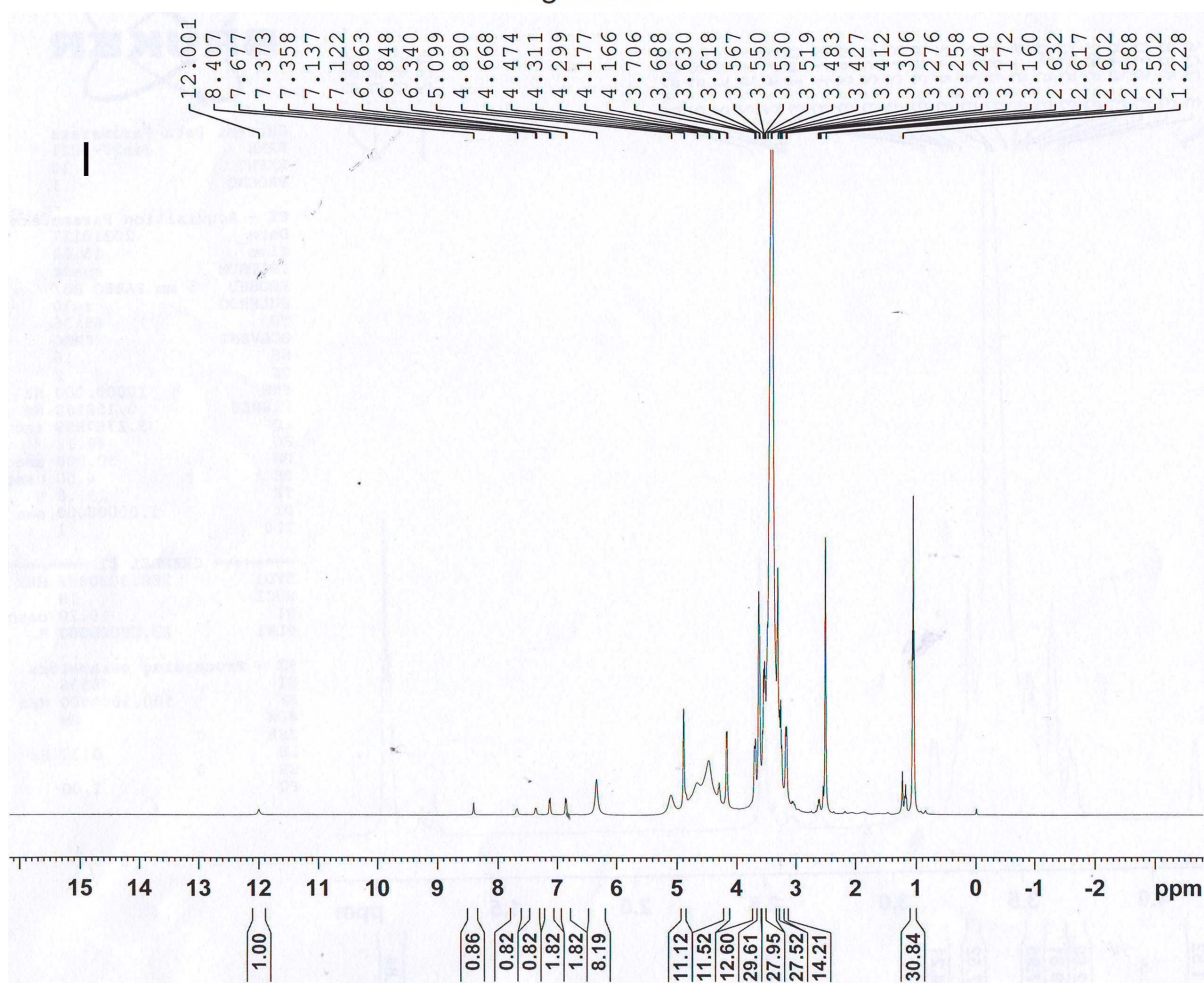

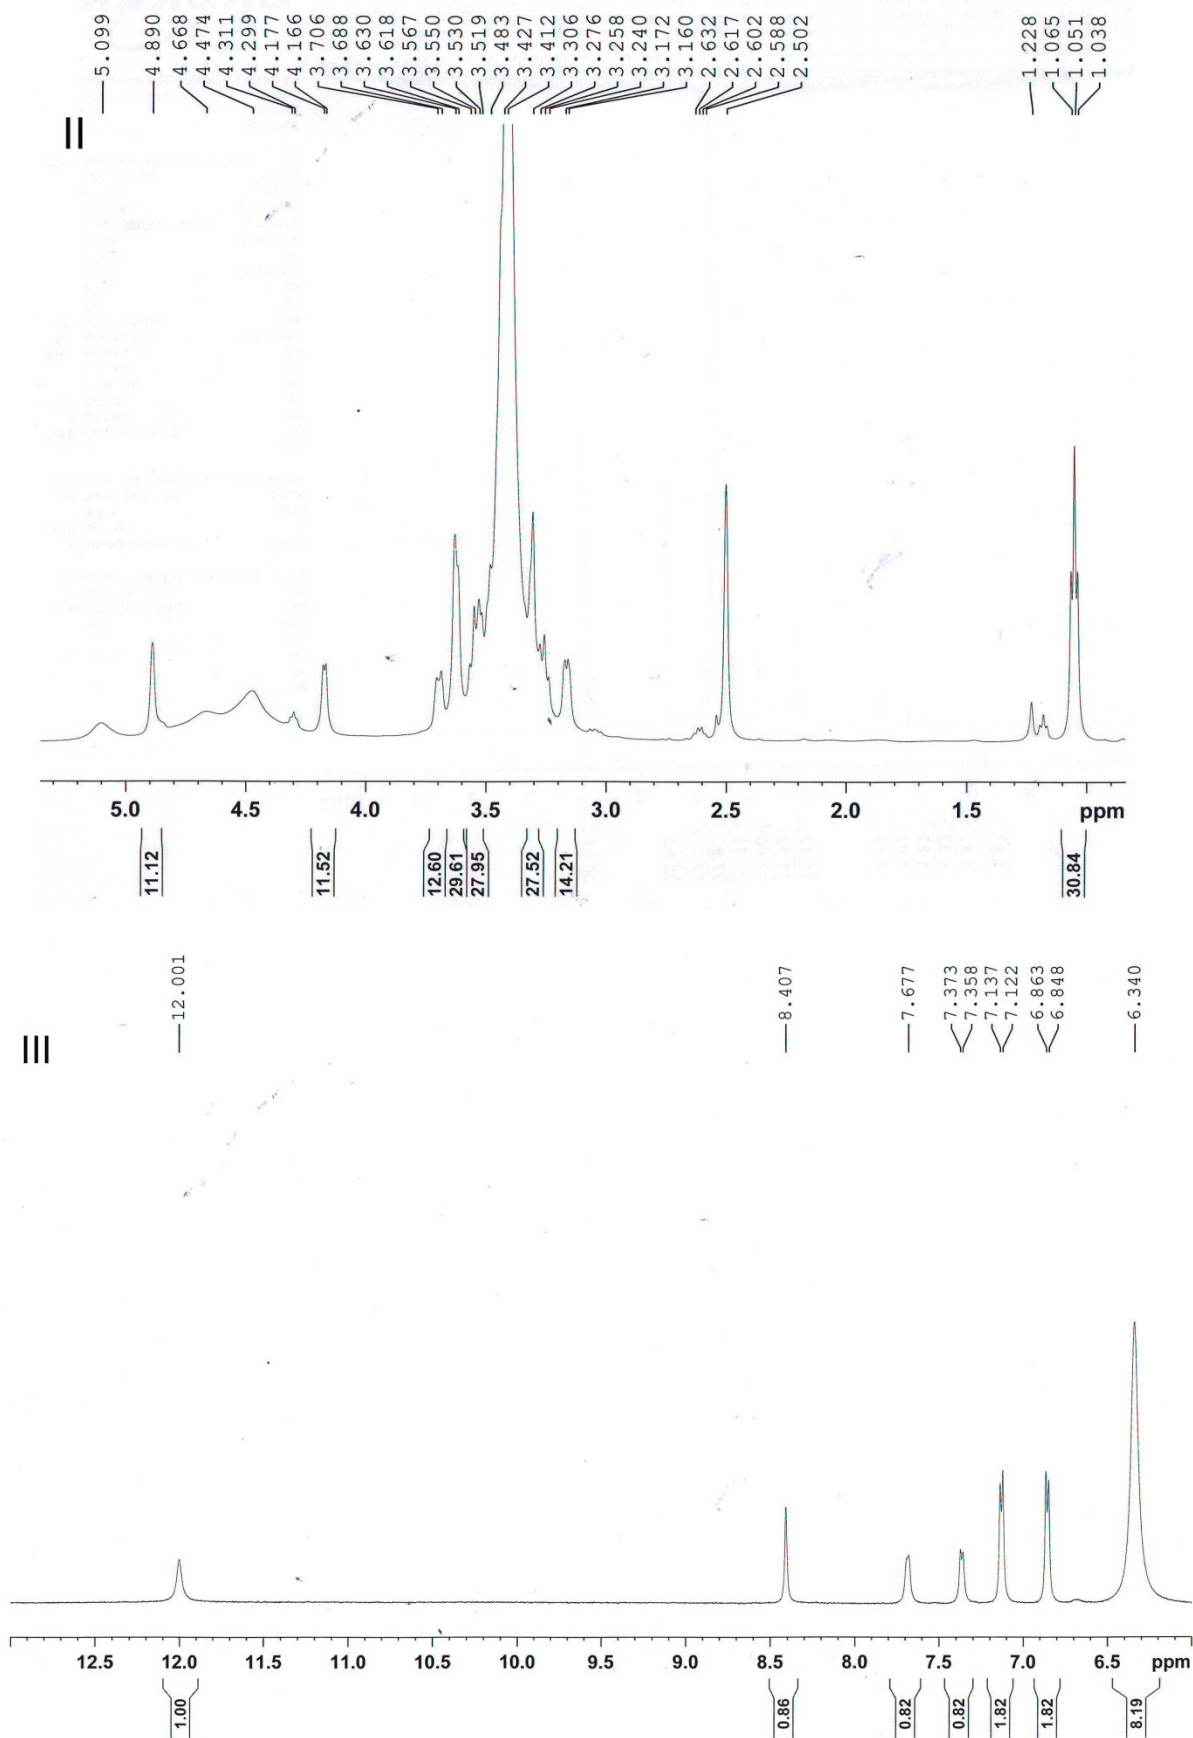

Figure S1: <sup>1</sup>H NMR of PIOZ hydrochloride (I) full scan, (II) zoom view from chemical shift,  $\delta=1$  to 5.0 and (III) zoom view from  $\delta=6.0$  to 13.0 in DMSO.

**Table S1:** XPS results for different functionalities.

| Peak characteristics |               | C1s      |          |              |         |         | O1s      |          |          |          | N1s         |            |              |                   |
|----------------------|---------------|----------|----------|--------------|---------|---------|----------|----------|----------|----------|-------------|------------|--------------|-------------------|
|                      |               | C-OH     | C=C      | C-C          | C-O-C   | COOH    | Quinones | C=O      | C-O      | O-H      | Pyridinic N | Pyrrolic N | Quaternary N | Pyridinic oxide N |
| GO                   | Peak-position | 282.57   | 284.11   | 284.89       | 286.39  | 288.13  | 529.91   | 530.71   | 531.6    | 533.57   | -           | -          | -            | -                 |
|                      | FWHM          | 1.58     | 1.3      | 1.41         | 1.85    | 2.08    | 1.16     | 1.2      | 1.39     | 2.36     | -           | -          | -            | -                 |
|                      | Area          | 103922.3 | 36850.2  | 149139.9     | 83506.9 | 39464.9 | 95859.8  | 160447.3 | 81658.1  | 102579.8 | -           | -          | -            | -                 |
|                      | % area        | 25.18    | 8.92     | 36.12        | 20.22   | 9.56    | 21.76    | 36.42    | 18.54    | 23.28    |             |            |              |                   |
| Nr-GO                | Peak-position | -        | 284.83   | 285.77 (C-N) | 286.88  | 289.24  | 530.64   | 531.43   | 532.37   | 533.39   | 399.27      | 400.76     | 401.43       | 404.94            |
|                      | FWHM          | -        | 0.79     | 1.0          | 0.97    | 1.71    | 0.85     | 1.25     | 1.07     | 1.5      | 1.56        | 1.39       | 1.02         | 1.74              |
|                      | Area          | -        | 320092.8 | 74985.5      | 32360.3 | 32578.7 | 20450.8  | 61022.6  | 36577.41 | 100237.1 | 5272.8      | 4357.9     | 2063.1       | 1406.8            |
|                      | % area        | -        | 69.58    | 16.30        | 7.02    | 7.10    | 9.38     | 27.95    | 16.75    | 45.92    | 40.25       | 33.26      | 15.75        | 10.74             |
| Nr-GO + PIOZ         | Peak-position | -        | -        | -            | -       | -       | -        | -        | -        | -        | 398.40      | 399.00     | 400.14       | 403.24            |
|                      | FWHM          | -        | -        | -            | -       | -       | -        | -        | -        | -        | 1.31        | 1.02       | 1.91         | 2.14              |
|                      | Area          | -        | -        | -            | -       | -       | -        | -        | -        | -        | 13705.1     | 5956.0     | 5929.6       | 3494.1            |
|                      | % area        | -        | -        | -            | -       | -       | -        | -        | -        | -        | 47.12       | 20.48      | 20.38        | 12.02             |

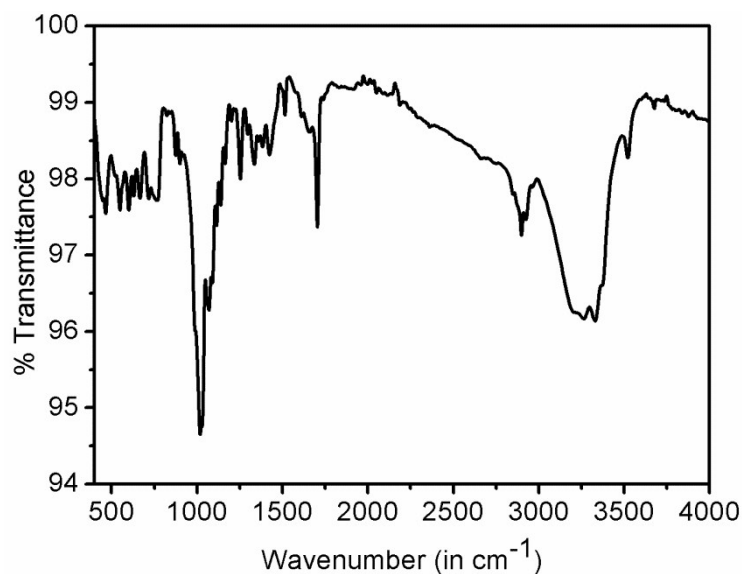

Figure S2: FTIR of PIOZ drug.

Table S2: FTIR band assignments of PIOZ drug.

| Wavenumber<br>(in $\text{cm}^{-1}$ ) | Appearance | Assignments                                |
|--------------------------------------|------------|--------------------------------------------|
| 3529                                 | Sharp      | O-H stretching                             |
| 3329                                 | Medium     | N-H (secondary amine)                      |
| 3263                                 | Weak       | O-H stretching (alcohol)                   |
| 2900                                 | Sharp      | C-H stretching (aliphatic group)           |
| 1710                                 | Sharp      | C=O stretching (secondary amide)           |
| 1518                                 | Sharp      | C=N stretching (pyridine moiety)           |
| 1429                                 | Medium     | =CH <sub>2</sub> bending (methylene group) |
| 1260                                 | Strong     | C-O stretching (alkyl-aryl ether moiety)   |
| 1023                                 | Strong     | C-O stretching (primary alcohol)           |
| 772                                  | Strong     | C-H bending (monosaturated)                |
| 671                                  | Strong     | C-S stretching                             |
| 592, 543, 466                        | Medium     | O-M stretching (M=Metal)                   |

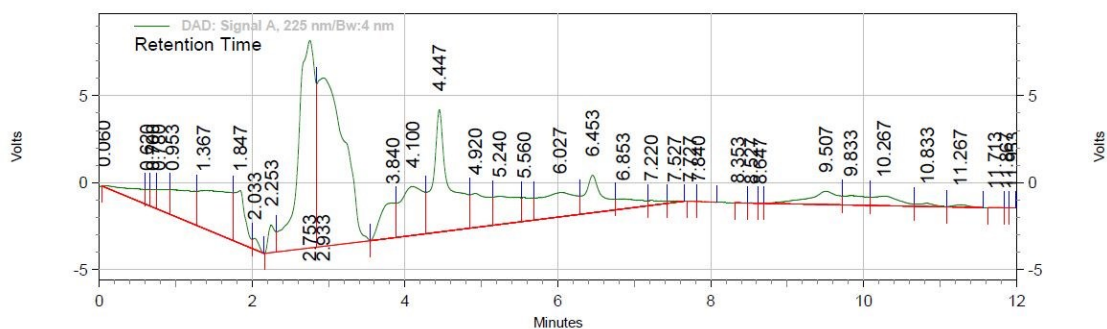

Figure S3: HPLC chromatogram in methanol without PIOZ drug

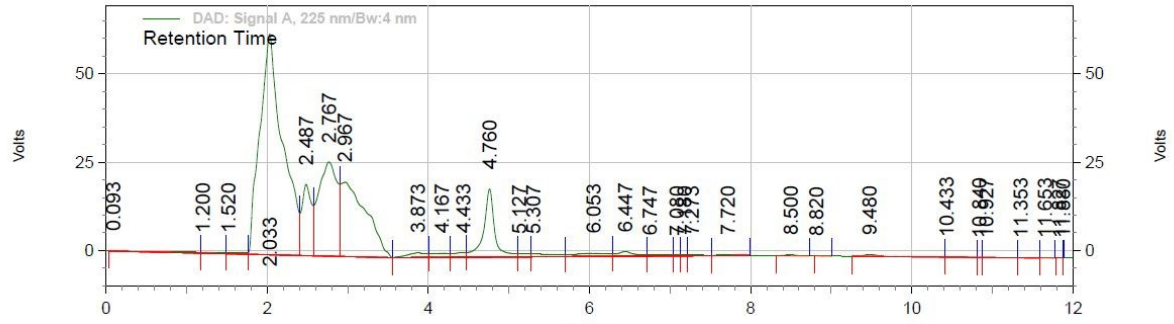

Figure S4: HPLC chromatogram in methanol with 10  $\mu$ M PIOZ drug

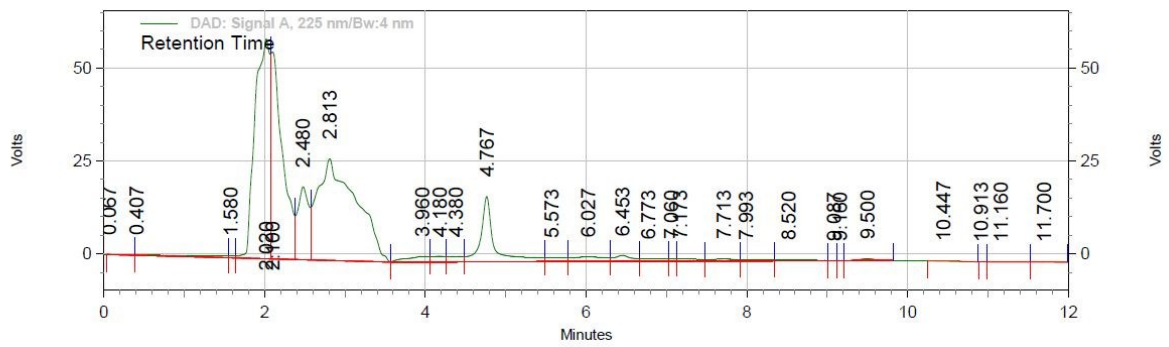

Figure S5: HPLC chromatogram in methanol with 15  $\mu$ M PIOZ drug

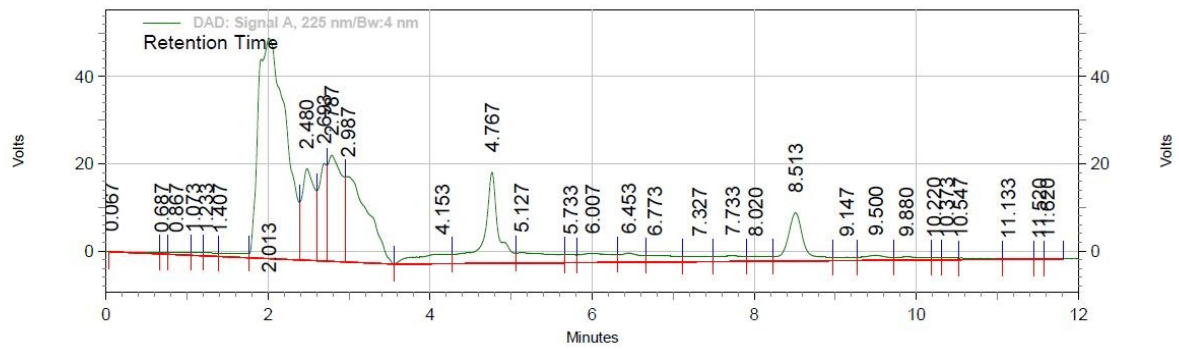

Figure S6: HPLC chromatogram in methanol with 30  $\mu$ M PIOZ drug

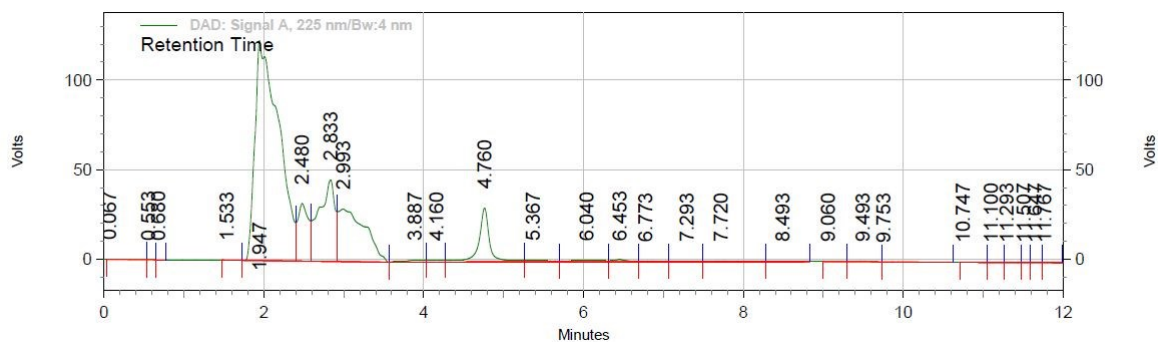

Figure S7: HPLC chromatogram in methanol with 40  $\mu\text{M}$  PIOZ drug

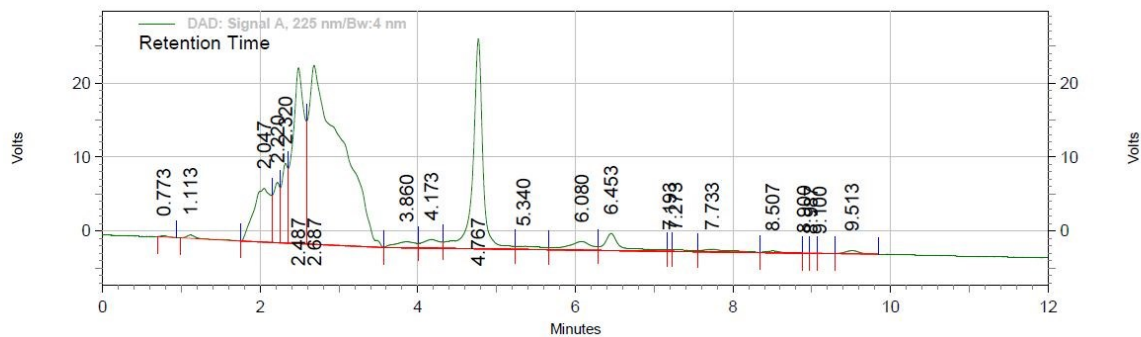

Figure S8: HPLC chromatogram in methanol with unknown sample of PIOZ drug

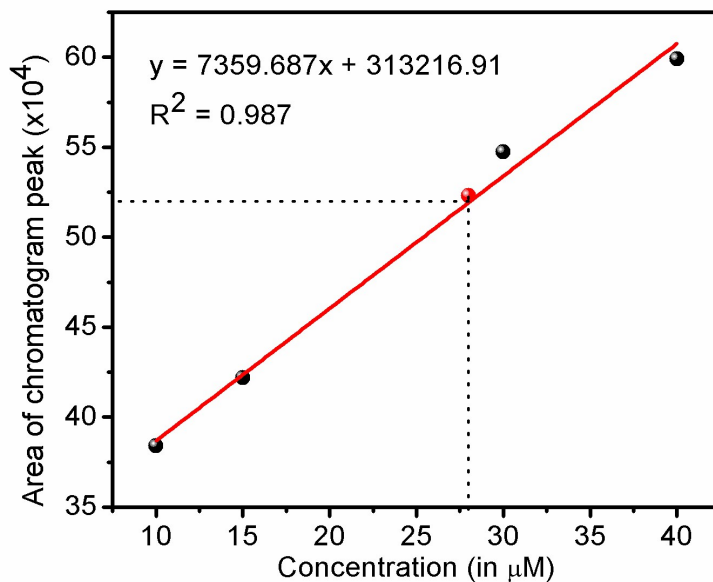

Figure S9: Linear relationship between concentration of PIOZ and Area of chromatogram obtained from HPLC method



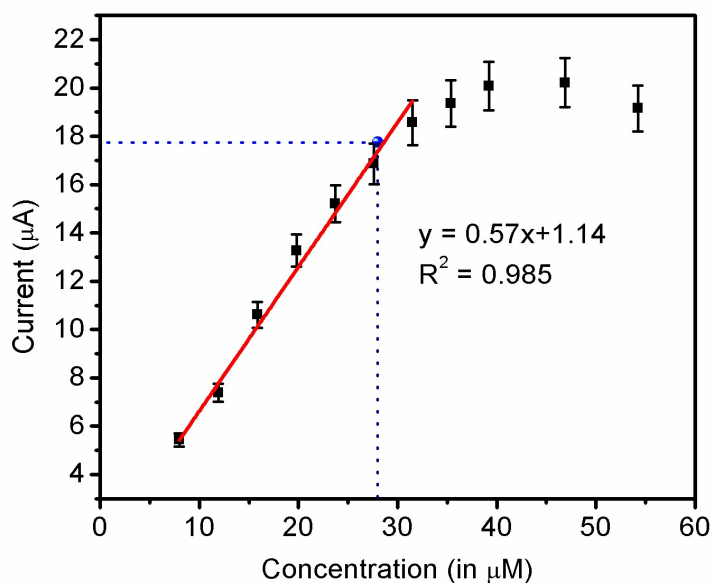

Figure S10: Linear relationship between concentration of PIOZ and oxidation peak current obtained from Electrochemical method on GCE (same calibration shown in Figure 5 Inset)

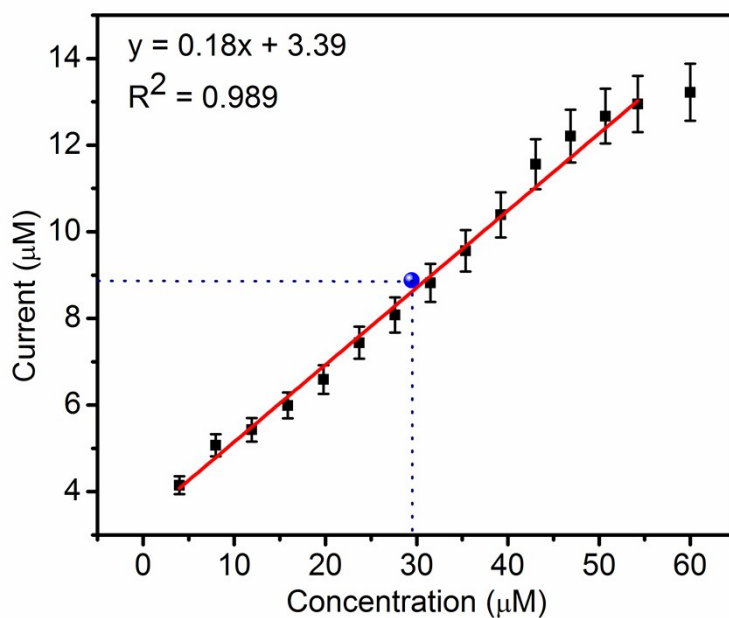

Figure S11: Linear relationship between concentration of PIOZ and oxidation peak current obtained from Electrochemical method on SPGE (same calibration shown in Figure 6B)
